# Supplementary material for: Evaluation and intercomparison of wildfire smoke forecasts from multiple modeling systems for the 2019 Williams Flats fire
Source: Copernicus journal article supplement (doi:10.5194/acp-21-14427-2021), 2021-09-29
Supplement: Supplementary file 1 [file acp-21-14427-2021-supplement.zip]

Archive with 2 entries (2 files):
- models_intercomparison_supplement_XYe.docx
- acp-21-14427-2021-supplement-title-page.pdf
