# Supplementary material for: Evaluation and intercomparison of wildfire smoke forecasts from multiple modeling systems for the 2019 Williams Flats fire
Source: Copernicus journal article supplement (doi:10.5194/acp-21-14427-2021), 2021-09-29
Supplement: Supplementary file 1 [file acp-21-14427-2021-supplement.zip › acp-21-14427-2021-supplement-title-page.pdf]

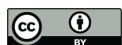

*Supplement of*

## **Evaluation and intercomparison of wildfire smoke forecasts from multiple modeling systems for the 2019 Williams Flats fire**

**Xinxin Ye et al.**

*Correspondence to:* Xinxin Ye ([xinxinye@ucla.edu](mailto:xinxinye@ucla.edu)) and Pablo E. Saide ([saide@atmos.ucla.edu](mailto:saide@atmos.ucla.edu))

- [acp-21-14427-2021-supplement-title-page.pdf](#)
- [models\\_intercomparison\\_supplement\\_XYe.docx](#)

The copyright of individual parts of the supplement might differ from the article licence.
